# Supplementary material for: Calculus Bovis Sativus Improves Bile Acid Homeostasis via Farnesoid X Receptor-Mediated Signaling in Rats With Estrogen-Induced Cholestasis
Source: PubMed Central journal article supplement (PMC6367682; doi:10.3389/fphar.2019.00048), 2019-02-01
Supplement: Data_Sheet_1.pdf [file Data_Sheet_1.pdf]

## *Supplementary Material*

# ***Calculus Bovis Sativus* Improves Bile Acid Homeostasis via Farnesoid X Receptor-Mediated Signaling in Rats with Estrogen-Induced Cholestasis**

**Dong Xiang<sup>1</sup>, Jinyu Yang<sup>1</sup>, Yanan Liu<sup>1</sup>, Wenxi He<sup>1</sup>, Si Zhang<sup>1</sup>, Xiping Li<sup>1</sup>, Chenliang Zhang<sup>1\*</sup>, Dong Liu<sup>1\*</sup>**

**\* Correspondence:**

Dong Liu, MD.

E-mail address: ld2069@outlook.com

Chenliang Zhang, MD.

E-mail address: clzhang@tjh.tjmu.edu.cn

## **1 Supplementary Figures and Tables**

### **1.1 Supplementary Figures**

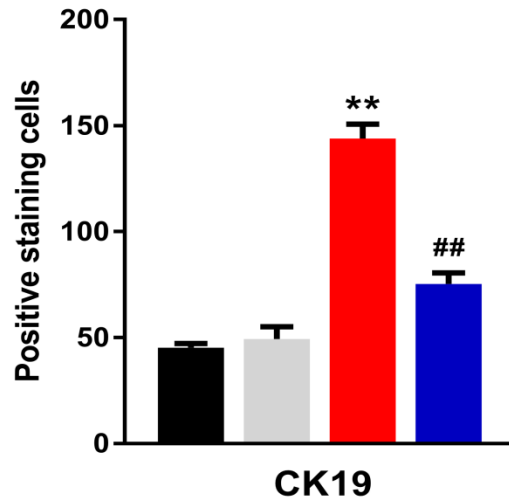

**Supplementary Figure 1.** Immunohistochemical positive staining cells of CK19 in non-cholestatic or cholestatic rats after vehicle or CBS administration. Positive staining cells were quantified by counting three different fields in each section. Data are presented as the mean  $\pm$ SD (n=6). Significant differences compared with non-cholestatic group, \*\*p<0.01, compared to 17 $\alpha$ -ethinylestradiol (EE) group, ##p<0.01.

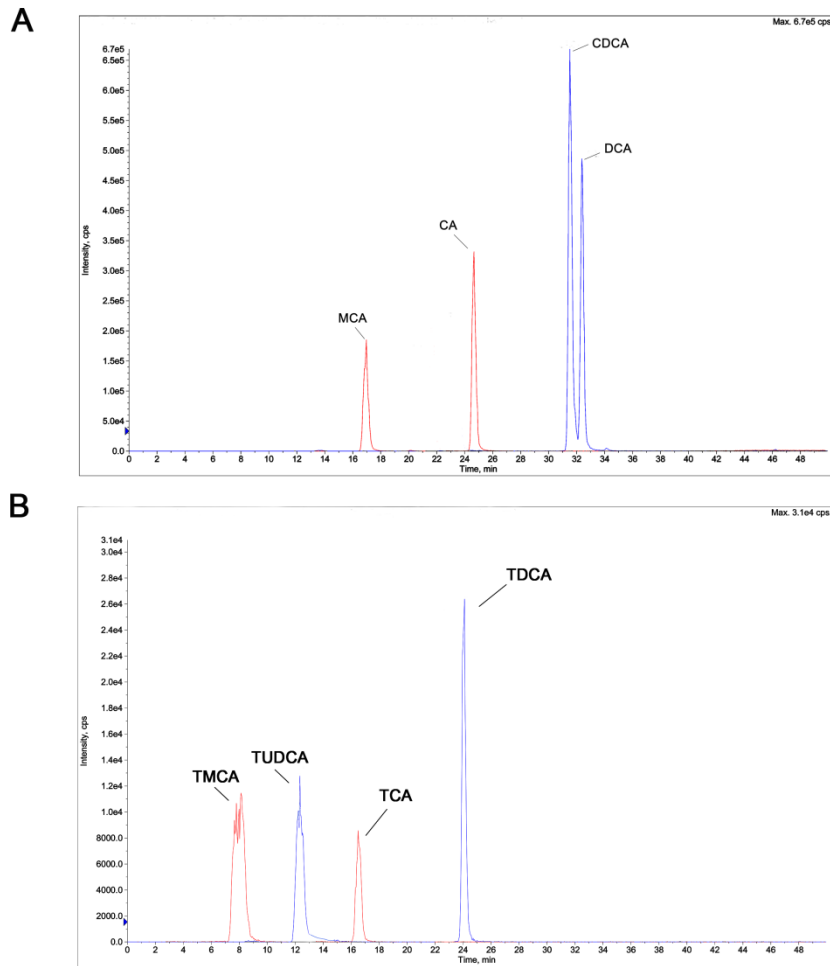

**Supplementary Figure 2.** Representative LC-MS/MS chromatogram of bile acids in liver. (A) Unconjugated bile acids and (B) conjugated bile acids. Abbreviations: MCA, muricholic acid; CA, cholic acid; CDCA, chenodeoxycholic acid; DCA, deoxycholic acid; TMCA, tauromuricholic acid; TCA, taurocholic acid; TDCA, taurodeoxycholic acid; TUDCA, tauroursodeoxycholic acid.

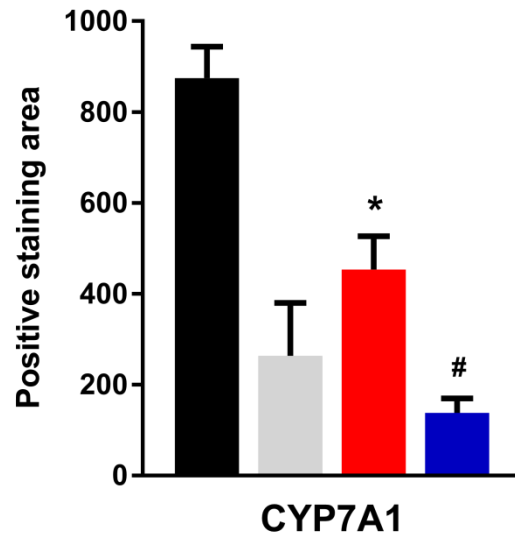

**Supplementary Figure 3.** Immunohistochemical positive staining area of hepatic CYP7A1 in non-cholestatic or cholestatic rats after vehicle or CBS administration. Positive staining was quantified by counting three different fields in each section. Data are presented as the mean ± SD (n=6). Significant differences compared with non-cholestatic group, \*p<0.05, compared to 17 $\alpha$ -ethinylestradiol (EE) group, #p<0.05.

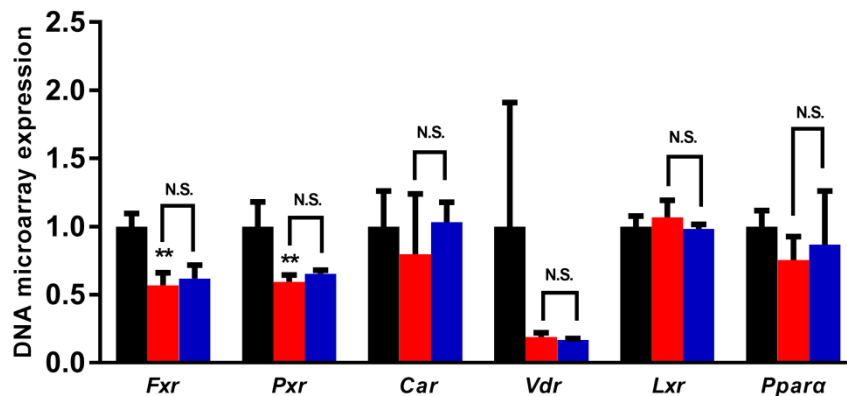

**Supplementary Figure 4.** Gene expressions of hepatic nuclear receptors Fxr, Pxr, Car, Vdr, Lxr and Ppara analyzed by DNA microarray. Data are presented as the mean ± SD (n=3). Significant differences compared with non-cholestatic group, \*\*p<0.01.

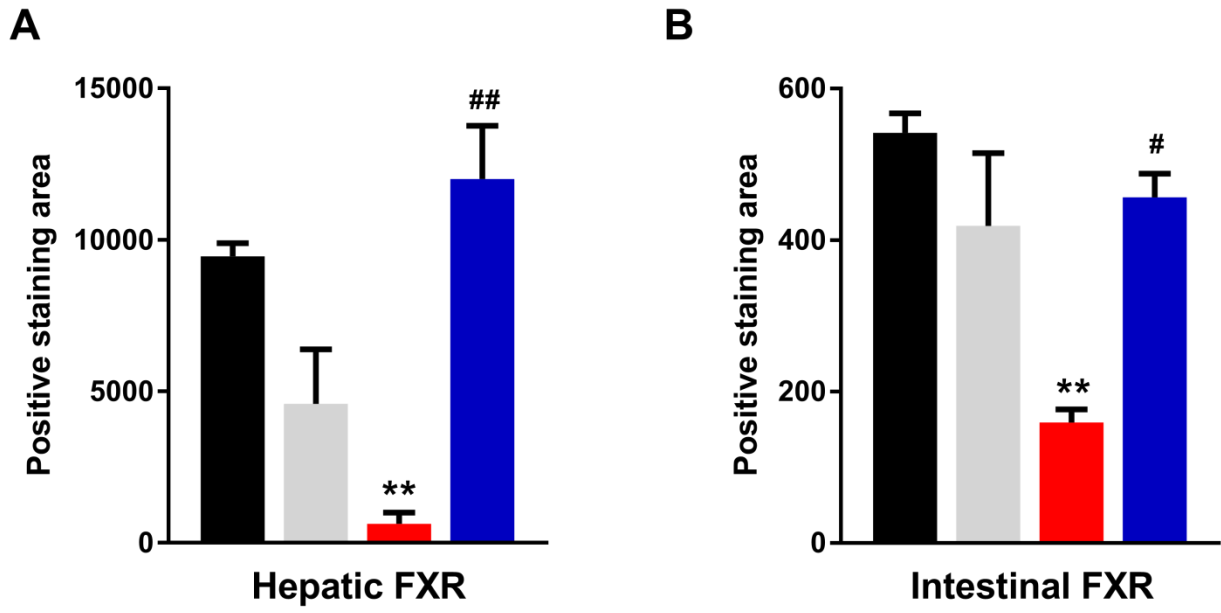

**Supplementary Figure 5.** Immunohistochemical positive staining area of hepatic FXR and intestinal FXR in non-cholestatic or cholestatic rats after vehicle or CBS administration. Positive staining was quantified by counting three different fields in each section. Data are presented as the mean $\pm$ SD (n=3). Significant differences compared with non-cholestatic group, \*\*p<0.01, compared to 17 $\alpha$ -ethinylestradiol (EE) group, #p<0.05; ##p<0.01.

## 1.2 Supplementary tables

**Supplementary Table 1** The primer sequences used for real-time PCR assay in rats

| Gene           | Accession NO.  | Protein | Forward primer (5' →3')   | Reverse primer (5' →3')  | Product length |
|----------------|----------------|---------|---------------------------|--------------------------|----------------|
| <i>Slc10a1</i> | NM_017047.1    | NTCP    | TGCACCATAGGGATCGTCCTC     | GATGCTGTTGCCACATTGA      | 135            |
| <i>Slco1a1</i> | NM_017111.1    | OATP1A1 | TGGGGAAGGTTGCTGGCCCAATTT  | GGTGGTTAATCCAGCAACTGCTGC | 659            |
| <i>Abcc3</i>   | NM_080581.1    | MRP3    | TCCCCTTCTCGGAGACAGTAAC    | CTTAGCATCACTGAGGACCTTGAA | 87             |
| <i>Abcc4</i>   | NM_133411.1    | MRP4    | GAAGGAAAATGAGGAAGCAGAG    | GGATGACTGTTGAGACCAAATC   | 100            |
| <i>Slco1b2</i> | NM_001270587.1 | OATP1B2 | AGACGTTCCCATCACAAACCAC    | GCCTCTGCAGCTTTCCTTGA     | 68             |
| <i>Abcc2</i>   | NM_012833.2    | MRP2    | CTCGGTCTTATGCGGCGTATTC    | CCGTGACTGATGGAGTTTGTGTT  | 179            |
| <i>Abcb11</i>  | NM_031760.1    | BSEP    | CGTGCTTGTTGGAAGAAGTTG     | GGGAGTAGATGGGTGTGACTG    | 131            |
| <i>Abcb4</i>   | NM_012690.2    | MDR2    | CTGTAGCGGGAATTGTTG        | GATGCCGTAGATGTGAGC       | 215            |
| <i>Cyp7a1</i>  | NM_012942.2    | CYP7A1  | GTCCGGATATTCAAGGATGC      | GGGAATGCCATTTACTTGGGA    | 107            |
| <i>Cyp8b1</i>  | NM_031241.1    | CYP8B1  | ATGAAGGCTGTGCGAGAG        | TCTCTTCATCACGCTGTC       | 127            |
| <i>Cyp3a2</i>  | NM_153312.2    | CYP3A2  | TGACTGCTCTTGATGCATGGTT    | ATCACAGACCTTGCCAACTCCT   | 104            |
| <i>Cyp2b10</i> | XM_017594657.1 | CYP2B10 | GGTGGAGGAACTGCGGAAAT      | TGATGACTGGAAGAGGAAGGT    | 65             |
| <i>Sult2a1</i> | NM_131903.1    | SULT2A1 | AGGAACGAACTGGCTGATTG      | ATGGGAAGATGGGAGGTCAT     | 171            |
| <i>Slc27a5</i> | NM_024143.2    | BAL     | TGCCCTTGCTACACTCTG        | TGGTCCCTGAAGTATAGATG     | 264            |
| <i>Baat</i>    | NM_017300.2    | BAAT    | CTGTGCAACTACGGTTTTGGCGAA  | TCAGGCCTGTGACCCGGATA     | 136            |
| <i>Nr1h4</i>   | NM_021745.1    | FXR     | TGAGCGTCTACAGCGAAAGTG     | GGGATGGTGGTCTTCAAATAAG   | 121            |
| <i>Nr1i3</i>   | XM_017598932.1 | CAR     | ACCAGTTGTGCAGTTCAGG       | CTTGAGAAGGGAGATCTGGT     | 197            |
| <i>Nr1i2</i>   | NM_052980.2    | PXR     | GACGGCAGCATCTGGAACCTAC    | TGATGACGCCCTTGAACATG     | 112            |
| <i>Nr1i1</i>   | NM_017058.1    | VDR     | GCCCCTATAAAGTTCAGGTG      | GGATAGCGGTCCTGAATGG      | 148            |
| <i>Nr1h3</i>   | XM_006234534.2 | LXR     | TCAGCATCTTCTCTGCAGACCGG   | TCATTAGCATCCGTGGGAACA    | 144            |
| <i>Ppara</i>   | XM_017594681.1 | PPARA   | CGGGTCATACTCGCAGGAAAG     | TGGCAGCAGTGAAGAATCG      | 155            |
| <i>Nr0b2</i>   | NM_057133.1    | SHP     | CTCGGTTTGCATACAGTGTGTTGAC | GCATATTGGCCTGGAGGTTTT    | 75             |
| <i>Fgf15</i>   | NM_130753      | FGF15   | ACGGGCTGATTCGCTACTC       | TGTAGCCCAAACAGTCCATTTCT  | 66             |

**Supplementary Table 2** linear regression, correlation coefficient, and linearity range of the bile acid determination

| Bile acids | Linear regression equation( $1/x^2$ ) | Correlation coefficient | linearity range ( $\mu\text{mol/L}$ ) |
|------------|---------------------------------------|-------------------------|---------------------------------------|
| TCA        | $y=0.548x-0.0108$                     | $r=0.9951$              | 0.275-100.0                           |
| DCA        | $y=6.6x+0.471$                        | $r=0.9972$              | 0.275-100.0                           |
| TDCA       | $y=0.707x-0.0131$                     | $r=0.9978$              | 0.275-100.0                           |
| T-MCA      | $y=0.57x-0.00806$                     | $r=0.9954$              | 0.275-100.0                           |
| MCA        | $y=8.25x-0.00303$                     | $r=0.9986$              | 0.0069-10.00                          |
| CA         | $y=7.96x+0.000283$                    | $r=0.9974$              | 0.0069-10.00                          |
| CDCA       | $y=5.92x-0.00455$                     | $r=0.9982$              | 0.0069-10.00                          |
| TUDCA      | $y=0.714x+0.000566$                   | $r=0.9974$              | 0.0069-10.00                          |

Abbreviations: MCA, muricholic acid; CA, cholic acid; CDCA, chenodeoxycholic acid; DCA, deoxycholic acid; TMCA, tauromuricholic acid; TCA, taurocholic acid; TDCA, taurodeoxycholic acid; TUDCA, tauroursodeoxycholic acid.

**Supplementary Table 3** Summary of intra-day accuracy, inter-day accuracy, precision, and recovery of the bile acid determination

| Bile acid | Quality control | Concentration ( $\mu\text{mol/L}$ ) | Intra-day(n=5) |        | Inter-day(n=5) |        | Recovery (%) |
|-----------|-----------------|-------------------------------------|----------------|--------|----------------|--------|--------------|
|           |                 |                                     | Accuracy (%)   | RSD(%) | Accuracy (%)   | RSD(%) |              |
| TCA       | LQC             | 11.1                                | 102.6          | 8.6    | 98.4           | 4.3    | 89.6         |
|           | MQC             | 50.0                                | 90.3           | 4.3    | 91.4           | 3.1    | 87.4         |
|           | HQC             | 80.0                                | 96.5           | 9.1    | 94.3           | 5.9    | 97.5         |
| DCA       | LQC             | 11.1                                | 103.6          | 6.3    | 97.5           | 5.8    | 91.1         |
|           | MQC             | 50.0                                | 94.2           | 2.1    | 96.3           | 2.4    | 95.3         |
|           | HQC             | 80.0                                | 89.3           | 8.7    | 91.5           | 6.3    | 94.2         |
| TDCA      | LQC             | 11.1                                | 98.4           | 11.6   | 94.2           | 5.6    | 100.3        |
|           | MQC             | 50.0                                | 101.2          | 8.9    | 99.4           | 4.9    | 96.4         |
|           | HQC             | 80.0                                | 91.1           | 3.7    | 93.5           | 8.5    | 97.6         |
| TMCA      | LQC             | 11.1                                | 93.6           | 9.4    | 97.1           | 2.9    | 91.2         |
|           | MQC             | 50.0                                | 98.1           | 13.4   | 97.2           | 7.4    | 97.3         |
|           | HQC             | 80.0                                | 91.7           | 11.3   | 89.4           | 4.8    | 92.7         |
| MCA       | LQC             | 1.11                                | 89.5           | 9.4    | 93.5           | 10.6   | 89.6         |
|           | MQC             | 5.00                                | 97.3           | 5.6    | 95.4           | 6.7    | 91.9         |
|           | HQC             | 8.00                                | 96.2           | 7.3    | 94.7           | 4.1    | 98.2         |
| CA        | LQC             | 1.11                                | 95.4           | 4.0    | 97.1           | 5.4    | 90.4         |
|           | MQC             | 5.00                                | 97.2           | 8.3    | 95.0           | 5.3    | 93.3         |
|           | HQC             | 8.00                                | 91.3           | 12.6   | 90.9           | 8.9    | 88.7         |
| CDCA      | LQC             | 1.11                                | 94.1           | 2.9    | 97.2           | 7.4    | 95.7         |
|           | MQC             | 5.00                                | 99.3           | 8.9    | 98.5           | 8.1    | 92.1         |
|           | HQC             | 8.00                                | 100.1          | 4.3    | 102.5          | 5.4    | 90.6         |
| TUDCA     | LQC             | 1.11                                | 92.4           | 5.9    | 89.1           | 8.9    | 98.9         |
|           | MQC             | 5.00                                | 94.8           | 8.3    | 91.7           | 7.3    | 100.8        |
|           | HQC             | 8.00                                | 88.3           | 7.8    | 92.6           | 4.4    | 101.6        |

Abbreviations: LQC, low quality control; MQC, middle quality control; HQC, high quality control.



**Supplementary Table 4** Gene ontology analysis of differentially expressed genes of non-cholestatic, 17 $\alpha$ -ethinylestradiol (EE) and EE+*Calculus Bovis Sativus* (CBS) groups

| Category | Term                                                                                    | Count | -lg(PValue) | Genes                                                                                                                                                                            |
|----------|-----------------------------------------------------------------------------------------|-------|-------------|----------------------------------------------------------------------------------------------------------------------------------------------------------------------------------|
| BP       | GO:0042493~response to drug                                                             | 10    | 3.18        | ECE1, MVD, NPPC, FZD1, COL1A1, AK4, CALR, AOC1, PFAS, NNMT                                                                                                                       |
| BP       | GO:1903298~negative regulation of hypoxia-induced intrinsic apoptotic signaling pathway | 2     | 1.74        | NOL3, PINK1                                                                                                                                                                      |
| BP       | GO:0000122~negative regulation of transcription from RNA polymerase II promoter         | 9     | 1.69        | CEBPA, TSC22D3, THRB, TBX3, HNRNPA2B1, PER1, CALR, CELA1, NFIB                                                                                                                   |
| BP       | GO:0050821~protein stabilization                                                        | 4     | 1.67        | ATP1B1, PINK1, CCT6A, CALR                                                                                                                                                       |
| BP       | GO:0060662~salivary gland cavitation                                                    | 2     | 1.57        | TGM2, NFIB                                                                                                                                                                       |
| CC       | GO:0070062~extracellular exosome                                                        | 26    | 3.62        | ATP1B1, THRB, POLG, HNRNPA2B1, IGFALS, PDIA6, PPCS, TFG, CCT6A, AK4, CALR, RPS2, PFAS, PTER, ACTG1, APP, ECE1, GSTK1, PTP4A1, TGFBI, TGM2, VNN1, RGD1309534, SCARB1, LAMC1, AOC1 |
| CC       | GO:0031012~extracellular matrix                                                         | 6     | 2.20        | TGFBI, TGM2, COL1A1, CCT6A, LAMC1, CALR                                                                                                                                          |
| CC       | GO:0005790~smooth endoplasmic reticulum                                                 | 3     | 2.11        | APP, PDIA6, CALR                                                                                                                                                                 |
| CC       | GO:0005925~focal adhesion                                                               | 7     | 2.01        | ACTG1, FZD1, TGM2, ZYX, CALR, PALLD, RPS2                                                                                                                                        |
| CC       | GO:0005794~Golgi apparatus                                                              | 10    | 1.87        | SLC39A14, APP, BLZF1, ING2, CABP2, SGPP1, COL1A1, CALR, TRIP11, CALU                                                                                                             |
| MF       | GO:0005515~protein binding                                                              | 17    | 2.66        | CEBPA, NOL3, MAFB, HNRNPA2B1, FZD1, CCNL1, PINK1, PDIA6, CCT6A, CALR, APP, BLZF1, CAPN10, TGM2, PER1, COL1A1, ERFFI1                                                             |
| MF       | GO:0019900~kinase binding                                                               | 4     | 2.06        | CEBPA, NOL3, PER1, ERFFI1                                                                                                                                                        |
| MF       | GO:0042803~protein homodimerization activity                                            | 10    | 1.93        | CEBPA, CHKA, ECE1, MASP1, THRB, MVD, NPPC, FZD1, SCARB1, AOC1                                                                                                                    |
| MF       | GO:0005506~iron ion binding                                                             | 5     | 1.84        | CYP2B2, CYP2B15, CALR, CYP8B1, PHF8                                                                                                                                              |
| MF       | GO:0004305~ethanolamine kinase activity                                                 | 2     | 1.74        | CHKA, ETNK1                                                                                                                                                                      |

Abbreviations: BP-biological process; CC-cellular component; MF-molecular function.

**Supplementary Table 5** Pathways analysis of differentially expressed genes of non-cholestatic, 17 $\alpha$ -ethinylestradiol (EE) and EE+*Calculus Bovis Sativus* (CBS) groups.

| Term                              | Count | -lg(PValue) | Genes                                                                                               |
|-----------------------------------|-------|-------------|-----------------------------------------------------------------------------------------------------|
| Metabolic pathways                | 15    | 2.323349    | CHKA, CYP2B2, HYKK, MVD, POLG, NDUFA6, PPCS, ETNK1, CYP2B15, AK4, CYP8B1, AOC1, PFAS, SLC27A5, NNMT |
| Bile secretion                    | 4     | 2.217689    | ATP1B1, ABCC3, SCARB1, SLC27A5                                                                      |
| Primary bile acid biosynthesis    | 2     | 1.090755    | CYP8B1, SLC27A5                                                                                     |
| Chemical carcinogenesis           | 3     | 1.08231     | CYP2B2, GSTK1, CYP2B15                                                                              |
| Phagosome                         | 4     | 1.077844    | ACTG1, SCARB1, CALR, CD209B                                                                         |
| Pantothenate and CoA biosynthesis | 2     | 1.019434    | VNN1, PPCS                                                                                          |
| Focal adhesion                    | 4     | 1.009053    | ACTG1, COL1A1, ZYX, LAMC1                                                                           |
